# Supplementary material
Source: PubMed Central journal article supplement (PMC2000418)

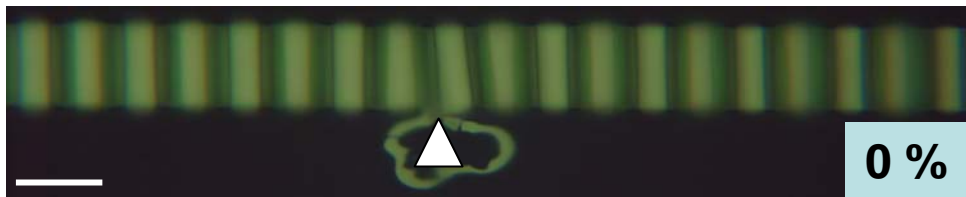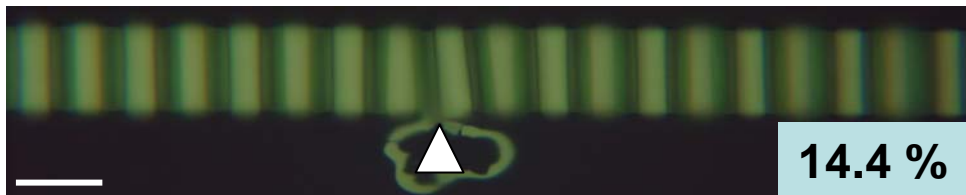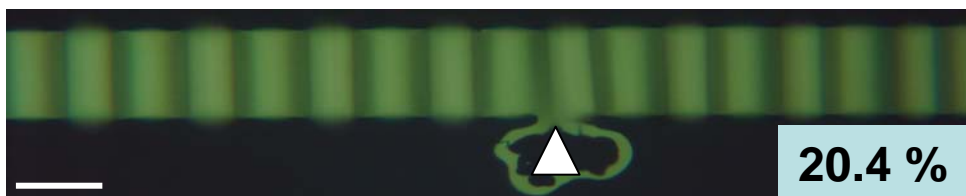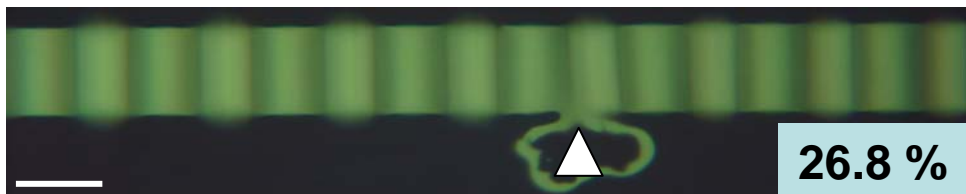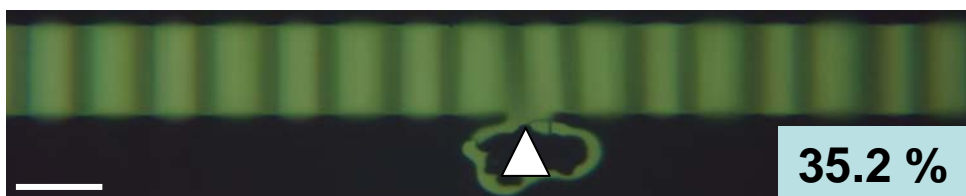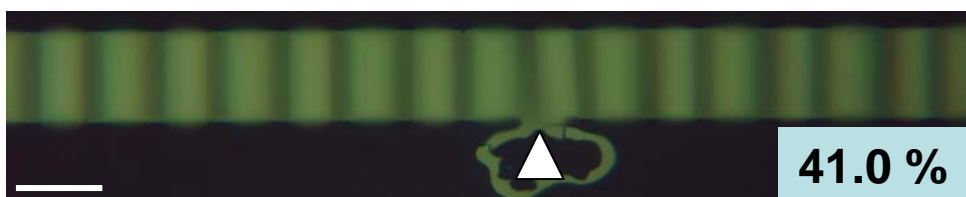

Supplement: pnas_0702927104_2.pdf [file pnas_0702927104_2.pdf]

-7%

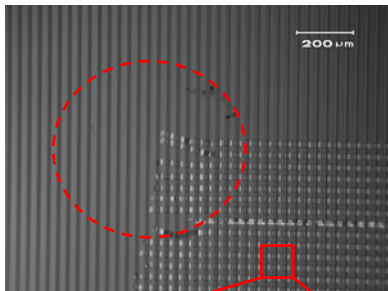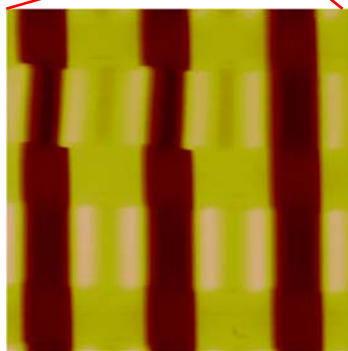

0%

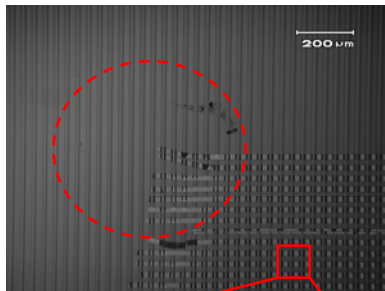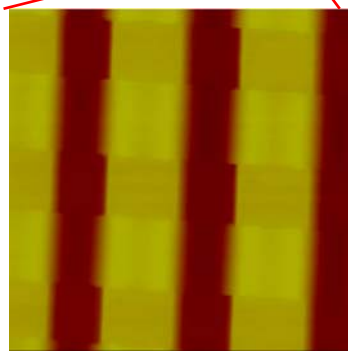

7%

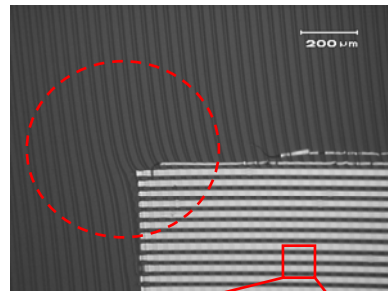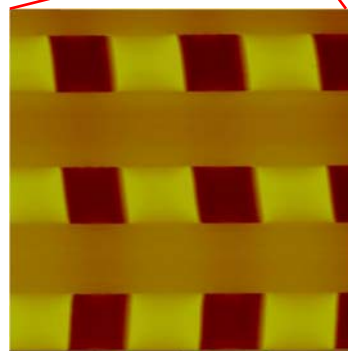

Supplement: pnas_0702927104_3.pdf [file pnas_0702927104_3.pdf]

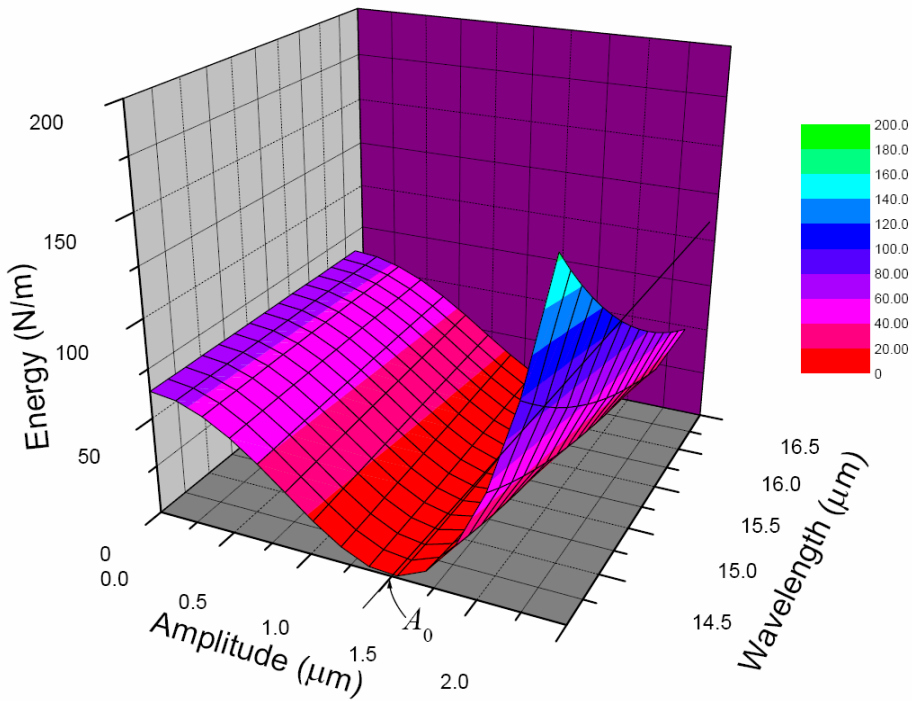

(a)

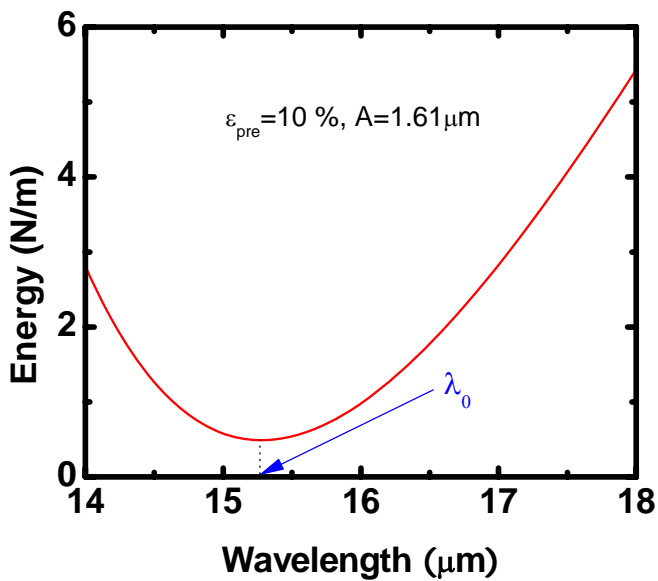

(b)

Supplement: pnas_0702927104_4.pdf [file pnas_0702927104_4.pdf]
